# Supplementary material
Source: publisher figshare collection journal article supplement (https://acs.figshare.com/ndownloader/files/4158109)
Supplement: Supplementary file 1 [file 4158109]

## Supporting Information Available

### Physical Data on Calcium Chloride Solution

Table 1: Physical data on used aqueous calcium chloride solution, all parameters measured at 20 °C.

| property                        | value                   |
|---------------------------------|-------------------------|
| CaCl <sub>2</sub> concentration | 3.36 mol/l              |
| density                         | 1.25 g/cm <sup>3</sup>  |
| dynamic viscosity               | 2.85 mPa*s              |
| surface tension                 | 75.97 mJ/m <sup>3</sup> |

### Picture of the used Squeegee

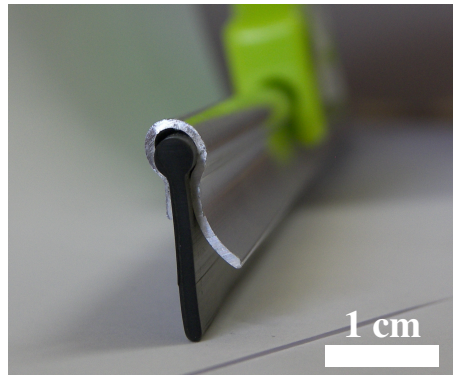

Figure 1: Profile of the squeegee (Rival, Gerhard Haas KG, Stockach, Germany) used to remove an excess of aqueous calcium chloride solution.

## Used Mask Patterns

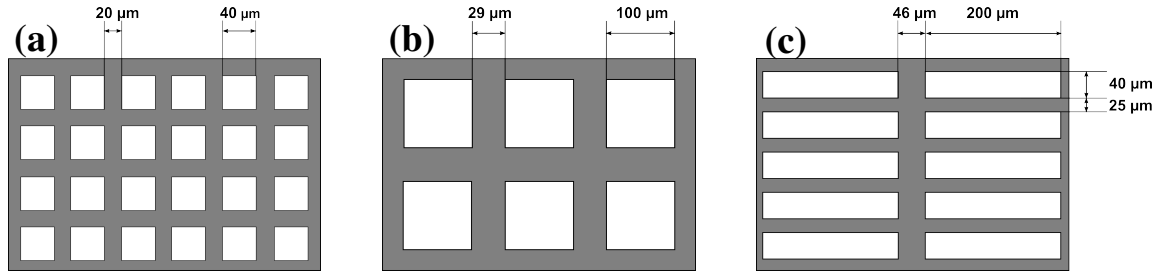

Figure 2: Draft of used mask patterns: (a) lithography mask with 40 μm square holes, (b) 200 mesh TEM-grid with 100 μm square holes, (c) 400 x 100 mesh TEM-grid with rectangular holes 40 μm x 200 μm.

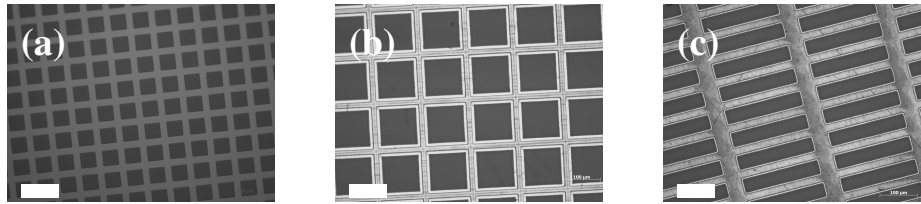

Figure 3: Optical microscopy images of used mask patterns: (a) lithography mask with 40 μm square holes, (b) 200 mesh TEM-grid with 100 μm square holes, (c) 400 x 100 mesh TEM-grid with rectangular 40 μm x 200 μm. Scale bars are 100 μm.

## EDX Measurement

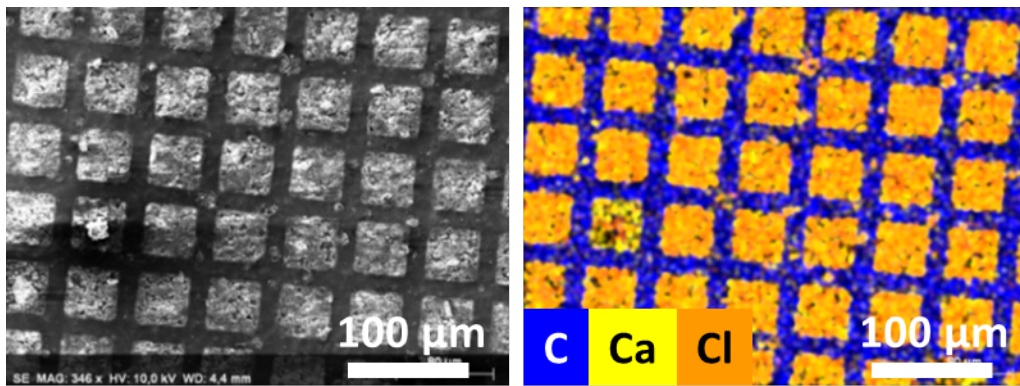

Figure 4: SEM picture and EDX element mapping of a structured substrate after application of aqueous calcium chloride solution and drying in vacuum.

## Derivation of the Polymer Height H

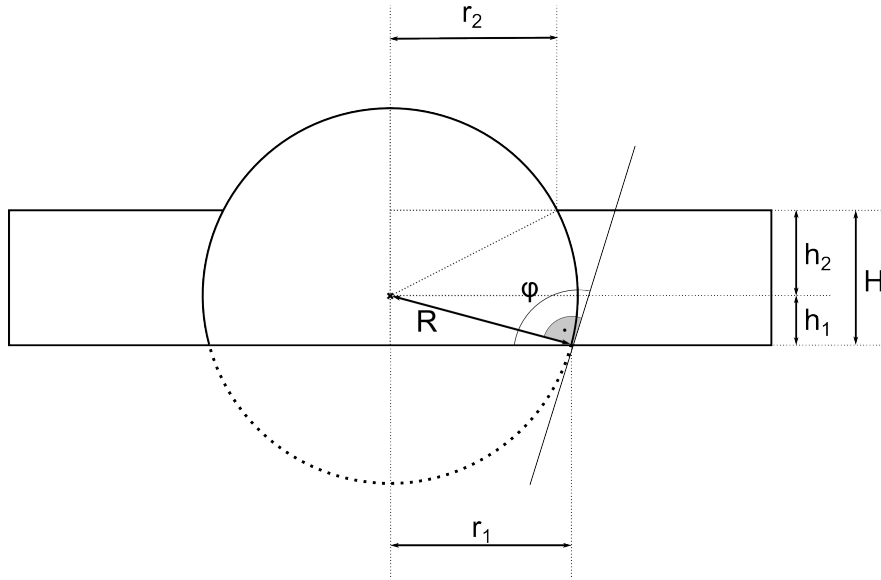

Figure 5

The height of the polymer film  $H$  equals the sum of  $h_1$  and  $h_2$  assuming that the given template droplet forms a perfect spherical cap as shown in Figure 5.

$$H = h_1 + h_2 \quad (1)$$

The first height  $h_1$  can be calculated with the help of the contact angle  $\varphi$  and the radius  $r_1$  of the droplet base.

$$h_1 = r_1 \cdot \tan(\varphi - 90^\circ) \quad (2)$$

The second height  $h_2$  is given through the radius  $R$  of the theoretical sphere that the droplet is part of and the radius  $r_2$  of the opening in the polymer film (the pore radius).

$$h_2 = \sqrt{R^2 - r_2^2} \quad (3)$$

The radius  $R$  of the full sphere is to be calculated with the help of  $r_1$  and the contact angle  $\varphi$ .

$$R = \frac{r_1}{\cos(\varphi - 90^\circ)} \quad (4)$$

If  $h_1$  and  $h_2$  in Eq. (1) are replaced by Eq. (2) and Eq. (3) Eq. (5) is the result.

$$H = r_1 \cdot \tan(\varphi - 90^\circ) + \sqrt{R^2 - r_2^2} \quad (5)$$

Using Eq. (4) for  $R$  Eq. (5) becomes Eq. (6).

$$H = r_1 \cdot \tan(\varphi - 90^\circ) + \sqrt{\frac{r_1^2}{[\cos(\varphi - 90^\circ)]^2} - r_2^2} \quad (6)$$

Eq. (6) becomes Eq. (7) after simplification.

$$H = r_1 \left( \tan(\varphi - 90^\circ) + \sqrt{\frac{1}{[\cos(\varphi - 90^\circ)]^2} - \left(\frac{r_2}{r_1}\right)^2} \right) \quad (7)$$

## AFM Measurement to obtain the Membrane Thickness

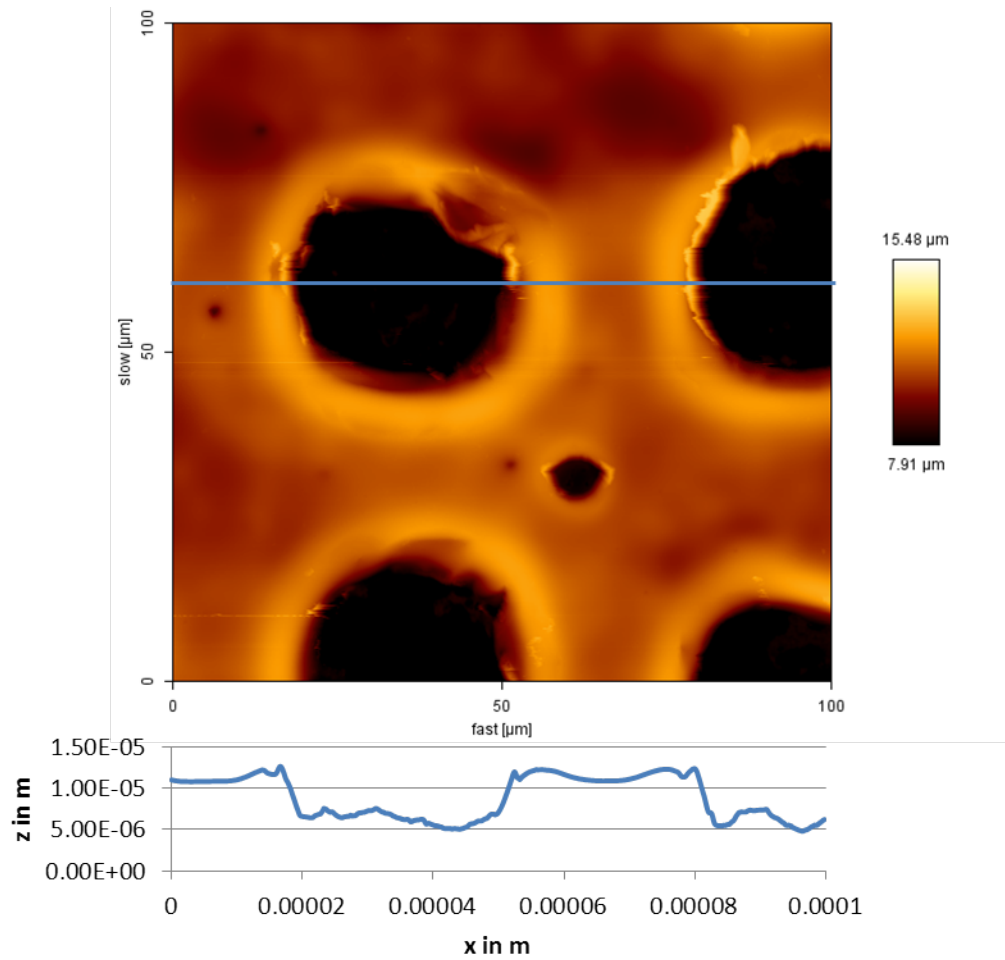

Figure 6: One of the AFM height pictures and cross sections of porous membranes that were used to obtain the membrane thickness. (The membrane thickness given in the text of  $4.6 \mu\text{m} \pm 0.78 \mu\text{m}$  is the average of 13 independent measurements on various membranes.)

## Model Suspension and Membrane after Filtration

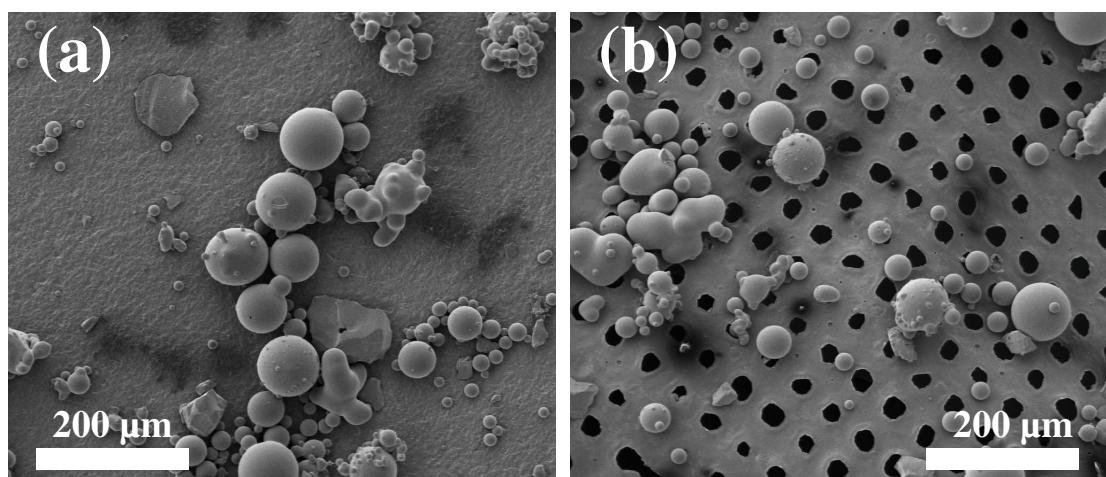

Figure 7: (a) particle mixture before filtration, (b) membrane after filtration with retained particles.

This material is available free of charge via the Internet at <http://pubs.acs.org/>.
